# Supplementary material
Source: PubMed Central journal article supplement (PMC3538313)
Supplement: mt2012207x1.pdf [file mt2012207x1.pdf]

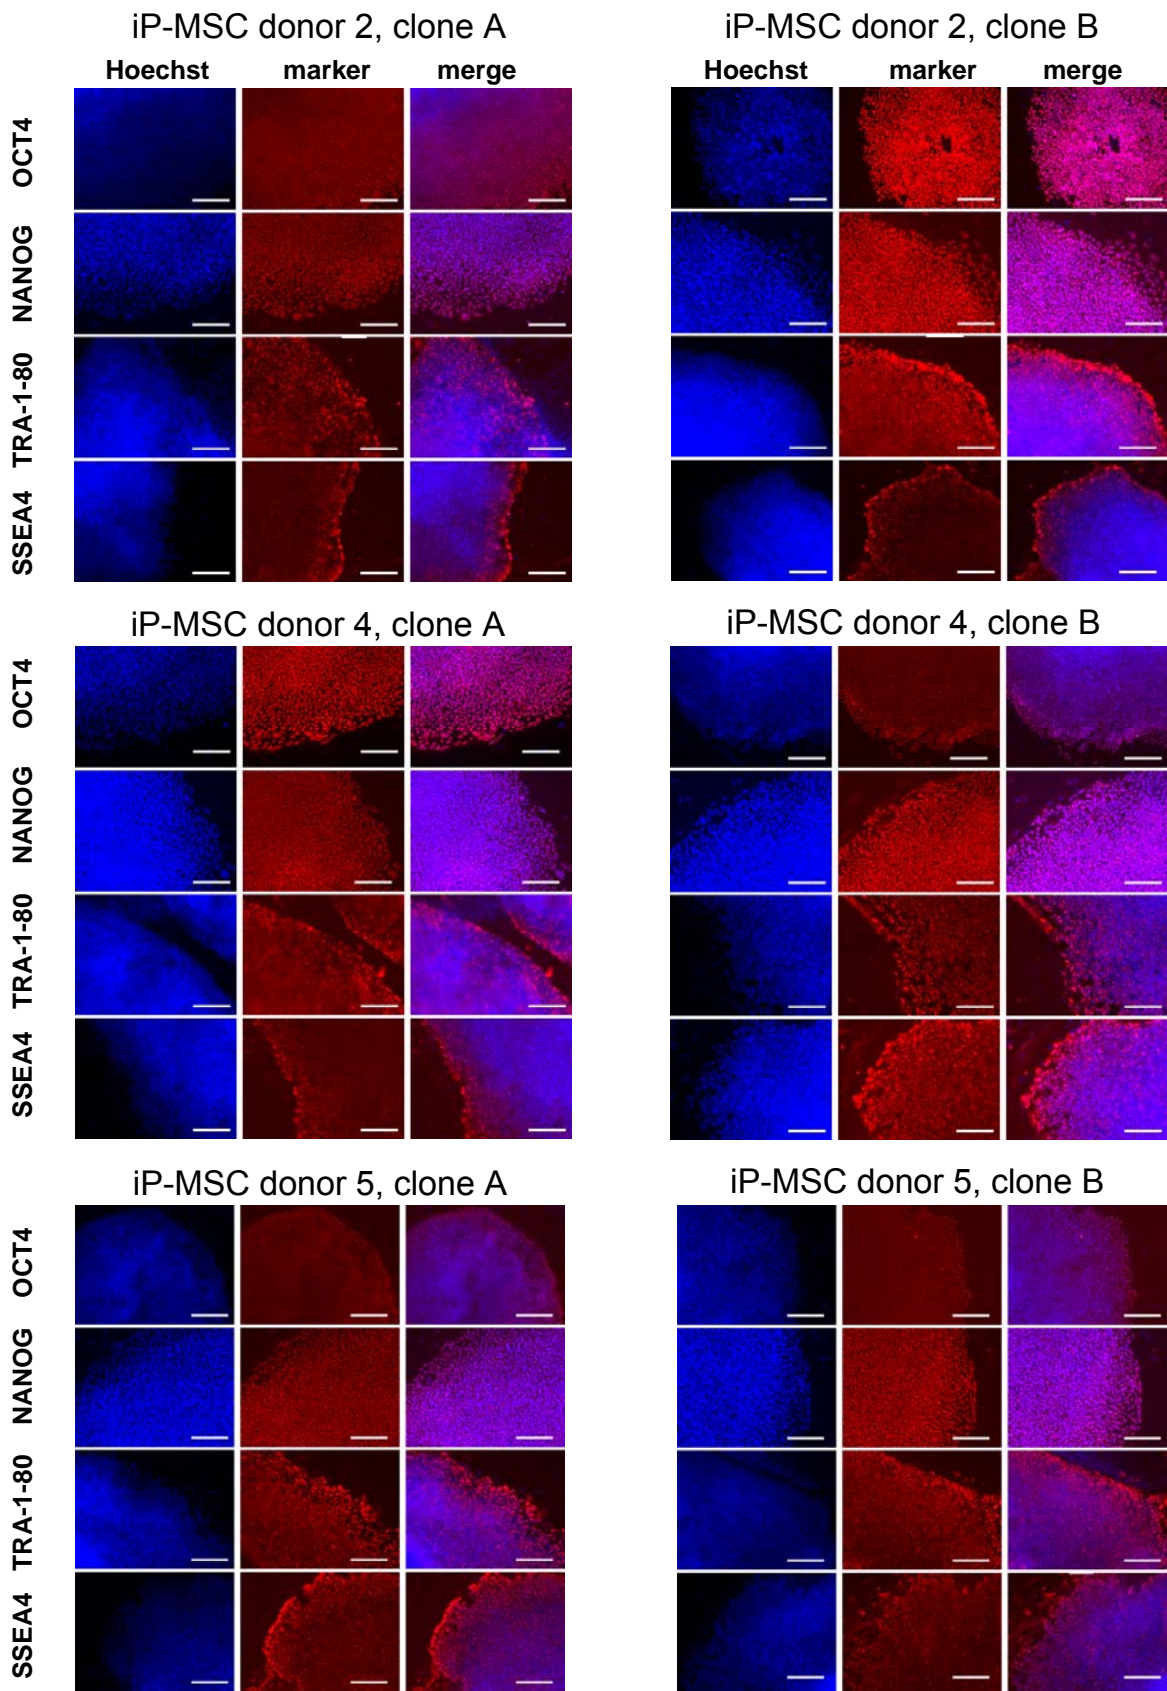

**Figure S1. Expression of pluripotency markers in different iP-MSC clones.** Pluripotency markers OCT4, NANOG, TRA-1-80 and SSEA4 in different iP-MSC lines and their subclones were detected by immunocytochemistry. Analysis was performed at passage 7. Scale bars, 200  $\mu$ m.
