# Supplementary material
Source: PubMed Central journal article supplement (PMC3538313)
Supplement: mt2012207x2.pdf [file mt2012207x2.pdf]

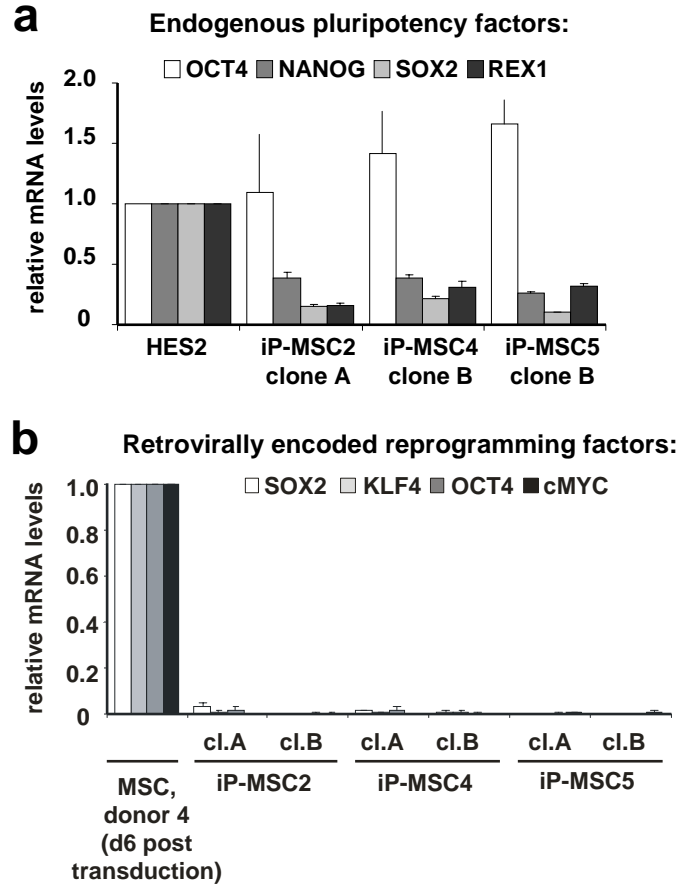

**Figure S2. Expression of endogenous and virally encoded pluripotency factors.** (a) Expression levels of endogenous transcripts of the indicated pluripotency factors was determined by qRT-PCR in human ES cell line HES2 and in indicated clones of iP-MSC donors 2, 4 and 5. Expression values were normalized to *GAPDH* and are presented as mean  $\pm$  SEM (n=3) relative to corresponding transcript levels in a conventional human ESC line HES2. (b) Silencing of the retroviral transgenes in two clones (A and B) of each of the three iP-MSC lines at passage 11 (iP-MSC2) or 10 (iP-MSC4 and iP-MSC5) as determined by quantitative RT-PCR. Parental MSC (donor 4) harvested six days post transduction with reprogramming retroviruses was used as a control.
