# Supplementary material
Source: PubMed Central journal article supplement (PMC3538313)
Supplement: mt2012207x3.pdf [file mt2012207x3.pdf]

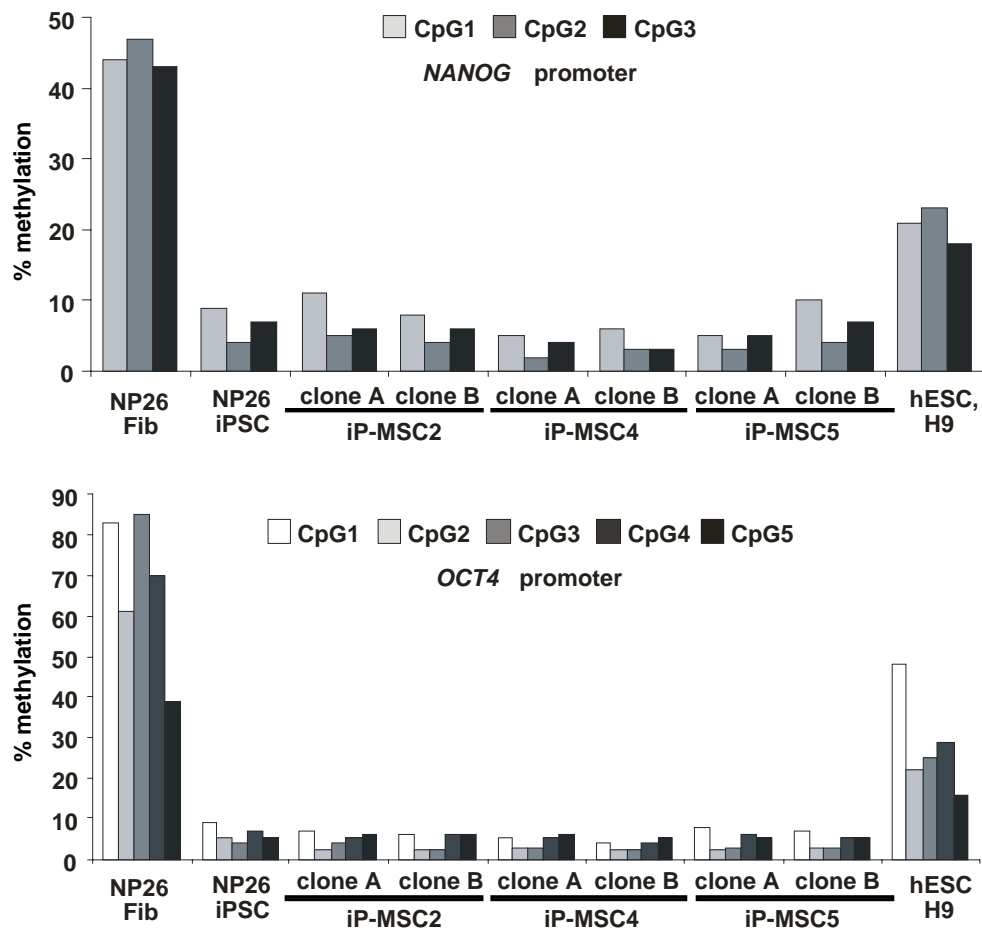

**Figure S3. Methylation status of the promoters of *NANOG* and *OCT4* genes.** Analysis was done by bisulfite pyrosequencing of genomic DNA isolated from indicated cell lines. Human dermal fibroblasts obtained from donor NP26, iPSC line derived from NP26 fibroblasts and conventional human ES cell line H9 were used as controls. Three CpG sites were analyzed in *NANOG* promoter and five in the *OCT4* promoter (see Table S7).
