# Supplementary material
Source: PubMed Central journal article supplement (PMC3538313)
Supplement: mt2012207x4.pdf [file mt2012207x4.pdf]

## nestin/Hoechst

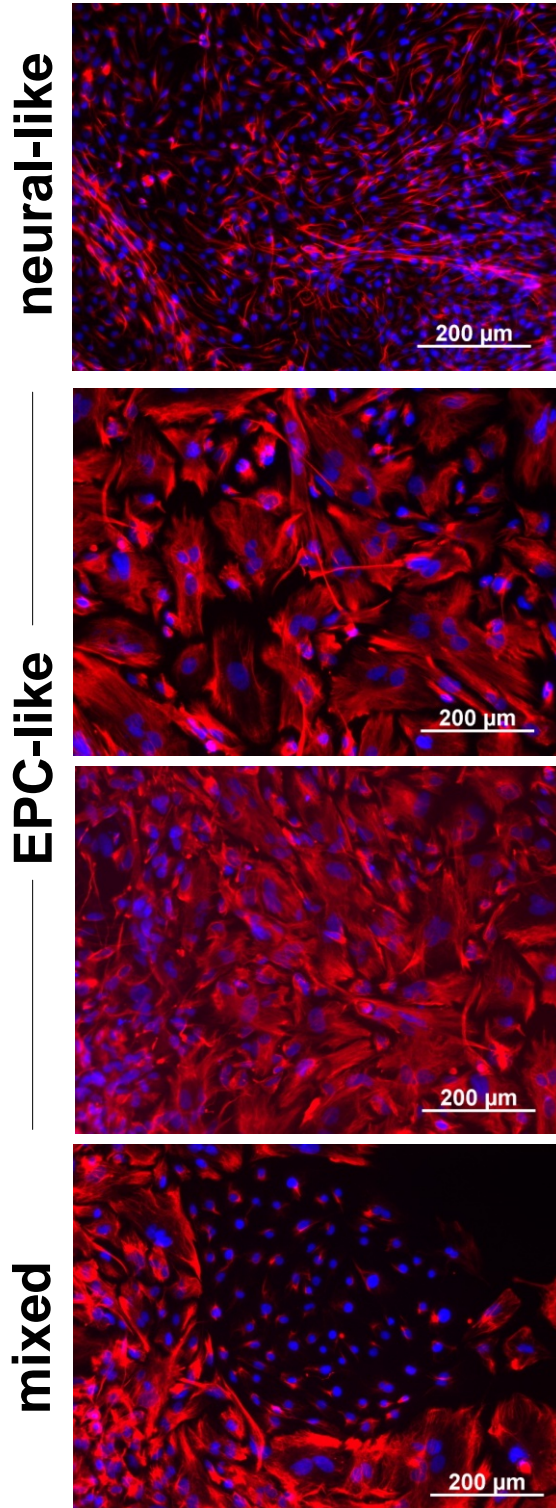

**Figure S4.** Immunocytochemical detection of nestin in differentiating iP-MSCs-derivatives from donor 4, clone B. Note that nestin expressing cells possess different morphologies in this differentiating culture. This may reflect the fact that nestin is also expressed in non-neural tissues such as proliferating endothelial progenitor cells (EPCs) and pancreatic islet cell precursors.
