# Supplementary material
Source: PubMed Central journal article supplement (PMC3538313)
Supplement: mt2012207x5.pdf [file mt2012207x5.pdf]

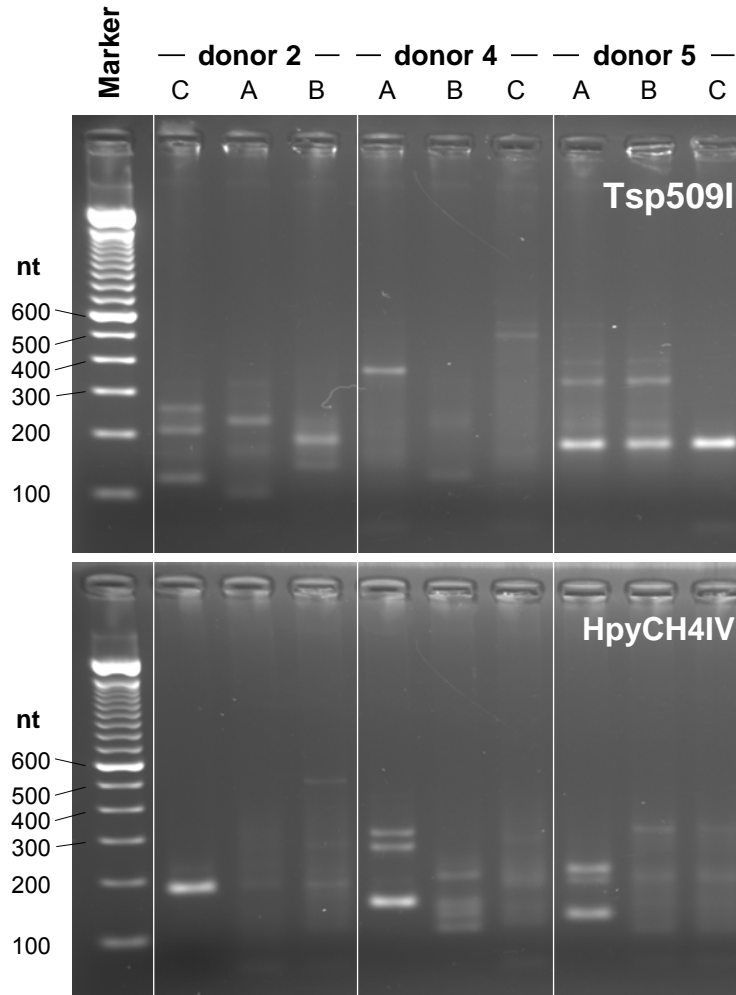

**Figure S5. Analysis of retroviral insertion sites in iP-MSC.** This analysis was performed by linear amplification-mediated PCR (LAM-PCR) in the genomes of three different iP-MSC clones (A, B and C) derived from each of three donors. LAM-PCR was performed on 250 ng - 1  $\mu$ g of DNA isolated from indicated iP-MSC lines to characterize the genomic localization of the vector. Integration site analysis by 5'-oriented LAM-PCR using the restriction enzyme Tsp509I (upper gel) or HpyCH4IV (bottom gel) was performed. LAM-PCR after gel separation of amplified integration sites identified different clonal patterns.
