# Supplementary material
Source: PubMed Central journal article supplement (PMC3538313)
Supplement: mt2012207x6.pdf [file mt2012207x6.pdf]

**Table S1. Microsatellite markers in three parental MSC preparations and reprogrammed iP-MSC lines.**

| Microsatellite marker | MSC donor 2 |          | iP-MSC from donor 2 |          |          |          |          |          |
|-----------------------|-------------|----------|---------------------|----------|----------|----------|----------|----------|
|                       |             |          | Clone A             |          | Clone B  |          | Clone C  |          |
|                       | Allele 1    | Allele 2 | Allele 1            | Allele 2 | Allele 1 | Allele 2 | Allele 1 | Allele 2 |
| D16S2621              | 235         | 255      | 235                 | 255      | 235      | 255      | 235      | 255      |
| D18S976               | 180         | 181      | 180                 | 181      | 180      | 181      | 180      | 181      |
| D1S466                | 161         | 161      | 161                 | 161      | 161      | 161      | 161      | 161      |
| D22S280               | 244         | 244      | 244                 | 244      | 244      | 244      | 244      | 244      |
| D3S1768               | 192         | 204      | 192                 | 204      | 192      | 204      | 192      | 204      |
| GAAT1A4               | 137         | 149      | 137                 | 149      | 137      | 149      | 137      | 149      |

  

| Microsatellite marker | MSC donor 4 |          | iP-MSC from donor 4 |          |          |          |          |          |
|-----------------------|-------------|----------|---------------------|----------|----------|----------|----------|----------|
|                       |             |          | Clone A             |          | Clone B  |          | Clone C  |          |
|                       | Allele 1    | Allele 2 | Allele 1            | Allele 2 | Allele 1 | Allele 2 | Allele 1 | Allele 2 |
| D16S2621              | 251         | 255      | 251                 | 255      | 251      | 255      | 251      | 255      |
| D18S976               | 169         | 184      | 169                 | 184      | 169      | 184      | 169      | 184      |
| D1S466                | 167         | 167      | 167                 | 167      | 167      | 167      | 167      | 167      |
| D22S280               | 250         | 252      | 250                 | 252      | 250      | 252      | 250      | 252      |
| D3S1768               | 196         | 196      | 196                 | 196      | 196      | 196      | 196      | 196      |
| GAAT1A4               | 153         | 153      | 153                 | 153      | 153      | 153      | 153      | 153      |

  

| Microsatellite marker | MSC donor 5 |          | iP-MSC from donor 5 |          |          |          |          |          |
|-----------------------|-------------|----------|---------------------|----------|----------|----------|----------|----------|
|                       |             |          | Clone A             |          | Clone B  |          | Clone C  |          |
|                       | Allele 1    | Allele 2 | Allele 1            | Allele 2 | Allele 1 | Allele 2 | Allele 1 | Allele 2 |
| D16S2621              | 235         | 255      | 235                 | 255      | 235      | 255      | 235      | 255      |
| D18S976               | 184         | 188      | 184                 | 188      | 184      | 188      | 184      | 188      |
| D1S466                | 157         | 173      | 157                 | 173      | 157      | 173      | 157      | 173      |
| D22S280               | 248         | 250      | 248                 | 250      | 248      | 250      | 248      | 250      |
| D3S1768               | 192         | 196      | 192                 | 196      | 192      | 196      | 192      | 196      |
| GAAT1A4               | 149         | 153      | 149                 | 153      | 149      | 153      | 149      | 153      |
