# Supplementary material
Source: PubMed Central journal article supplement (PMC3538313)
Supplement: mt2012207x9.pdf [file mt2012207x9.pdf]

**Table S4. MSC used in this study.**

| <b>MSC donor</b> | <b>Gender</b> | <b>Age</b> | <b>iP-MSC generated</b> | <b>Passage of iP-<br/>MSC analyzed</b> |
|------------------|---------------|------------|-------------------------|----------------------------------------|
| donor 2          | male          | 56         | iP-MSC2                 | P10                                    |
| donor 4          | female        | 64         | iP-MSC4                 | P9                                     |
| donor 5          | female        | 73         | iP-MSC5                 | P9                                     |
| donor 6          | male          | 31         | No                      | n/a                                    |
| donor 11         | male          | 59         | No                      | n/a                                    |
