# Supplementary material
Source: PubMed Central journal article supplement (PMC3538313)
Supplement: mt2012207x10.pdf [file mt2012207x10.pdf]

**Table S5. List of primer sequences used for PCR analyses.**

| <b>Gene<sup>a</sup></b> | <b>Sequence (5' to 3')</b>                              |
|-------------------------|---------------------------------------------------------|
| OCT4-endo               | F: TATGGGAGCCCTCACTTCAC<br>R: ACTTCACCTTCCCTCCAACC      |
| NANOG-endo              | F: GATTTGTGGGCCTGAAGAAA<br>R: ATCTGCTGGAGGCTGAGGTA      |
| SOX2-endo               | F: AGTCTCCAAGCGACGAAAAA<br>R: TTTCACAGTTTGCAACTGTCC     |
| REX1-endo               | F: TGAAAGCCCACATCCTAACG<br>R: CAAGCTATCCTCCTGCTTTGG     |
| hKLF4tg                 | F: CCACCTCGCCTTACACATGA<br>R: CCCTTTTTCTGGAGACTAAATAAA  |
| hMYCtg                  | F: GGAAACGACGAGAACAGTTGA<br>R: CCCTTTTTCTGGAGACTAAATAAA |
| hOCT3/4tg               | F: GCTCTCCCATGCATTCAAAC<br>R: TTATCGTCGACCACTGTGCTGCTG  |
| hSOX2tg                 | F: GGCCATTAACGGCACACTG<br>R: CCCTTTTTCTGGAGACTAAATAAA   |

<sup>a</sup> endo – primers used for amplification of endogenous transcripts;

tg – primers used for amplification of retroviral sequences.
