# Supplementary material
Source: PubMed Central journal article supplement (PMC3538313)
Supplement: mt2012207x11.pdf [file mt2012207x11.pdf]

**Table S6. Primers used for microsatellite analysis.**

| <b>Marker</b> | <b>Forward primer (3'→ 5')</b> | <b>Reverse primer (3'→ 5')</b> |
|---------------|--------------------------------|--------------------------------|
| D16S2621      | GTCATATGGGCCAATTCCC            | TACCGCGTAGTGAGACTGTG           |
| D18S976       | GGACTTCTCTGCTGCCATAA           | CTCCCTGATTTTTAGCTGGG           |
| D1S466        | CACTGCCTTTGGGGAC               | GGTCCTGCCTATCTGGGG             |
| D22S280       | CAGCCTATCAGGATGTGAGT           | CAGAGATCCGAGAATTGAAAG          |
| D3S1768       | GGTTGCTGCCAAAGATTAGA           | CACTGTGATTTGCTGTTGGA           |
| GAAT1A4       | ATTCGTCCACTCATTTGTCC           | CCCAAGGGCAGAAATTATTA           |
