# Supplementary material
Source: PubMed Central journal article supplement (PMC3538313)
Supplement: mt2012207x12.pdf [file mt2012207x12.pdf]

**Table S7. Genes and primers used for bisulfite pyrosequencing.**

| <b>Gene</b>  | <b>Primer</b>        | <b>Sequence (5' to 3')</b>   | <b>Chromosomal localization (bp)<sup>b</sup></b> | <b>Number and position (relative to TSS) of analyzed CpGs</b> |
|--------------|----------------------|------------------------------|--------------------------------------------------|---------------------------------------------------------------|
| <i>NANOG</i> | forward              | GGAATATGGTTTAATAGGAATGGGATAA | chromosome 12                                    | 3                                                             |
|              | reverse <sup>a</sup> | CCAAACTAATTTCAAACCTCCTAACTTC | (7,941,610 –                                     | (-296, -300, -                                                |
|              | sequencing           | TTTTAAAAATTAAGAAAAAGGT       | 7,941,761)                                       | 302)                                                          |
| <i>OCT4</i>  | forward              | GGGTTTTGGAAGTTTAGTTAGG       | chromosome 6                                     | 5                                                             |
|              | reverse <sup>a</sup> | CAAACCCTCATTTACCAA           | (31,138,275 –                                    | (+92, +84, +77,                                               |
|              | sequencing           | ATTTTATTATTTGGAGGGG          | 31,138,445)                                      | +62, +44)                                                     |

<sup>a</sup>biotinylated primer

<sup>b</sup>according to Ensembl release 62 - April 2011 (based on: Homo sapiens high coverage assembly GRCh37 from the Genome Reference Consortium)

TSS, transcription start site
